# Supplementary material for: Molecular Characterization of Antimicrobial Peptide Genes of the Carpenter Ant Camponotus floridanus
Source: PubMed Central journal article supplement (PMC3415428; doi:10.1371/journal.pone.0043036), 2012-08-09
Supplement: pone.0043036.s003.pdf [file pone.0043036.s003.pdf]

**Supplementary Table S1:** Primers used for characterization of *C. floridanus* hymenoptaecin and defensins.

| <b>Gene name</b>                                   | <b>Primer name</b>              | <b>Sequence 5'-3'</b>          | <b>Application</b>          |
|----------------------------------------------------|---------------------------------|--------------------------------|-----------------------------|
| <i>hymenoptaecin (hym)</i><br>(Acc. No.: HQ315784) | Cfl_hym_GSP1                    | GGCTGTGTGCCCTGGAACTTGTCTGAACCC | 5'RACE                      |
|                                                    | Cfl_hym_GSP2                    | GACCCGATGCGCAAAGGAGGAGCTT      | 3'RACE                      |
|                                                    | Cfl_hym_flSf                    | GAAGTAGCTTCACAGTAGAAACGAAAA    | Full length<br>sequence     |
|                                                    | Cfl_hym_flSR                    | TAATATTTTGTGAAACAGCCTCAAA      |                             |
|                                                    | Cfl_hym_seqF1                   | AGCTTCCAGAGCCCGATGC            | Sequencing<br>(Seq.) primer |
|                                                    | Cfl_hym_seqR1                   | GCCGAAGTTCCTTTCAGC             |                             |
|                                                    | Cfl_hym_introF1                 | CGCTTTCGCAAATGACTTCT           |                             |
|                                                    | Cfl_hym_5'F                     | TGGCCTTATTGTGCGCTATC           | 5'-probe                    |
| Cfl_hym_5'R                                        | CGGTTGTGCGACCATTGTTA            |                                |                             |
| Cfl_hym_repF                                       | GGCATCCAGGCTGAAAGAAG            | Repeat-<br>probe               |                             |
| Cfl_hym_repR                                       | TCCTCCGTAGACATCCGCTG            |                                |                             |
| Cfl_hymNdeI_F                                      | CGCATATGCAAGGAAGTTCCTAAGCT      | cloning into<br>pET-15b        |                             |
| Cfl_hymBamHI_R                                     | TAGGATCCTTAGAAGCGGTAGCCAGCACTTA |                                |                             |
| <i>defensin-1(def-1)</i><br>(Acc. No.: JN989495)   | Cfl_def-1_GSP1                  | TGCAGTGAGCTGCGCAAGCGCTATGAT    | 5'RACE                      |
|                                                    | Cfl_def-1_GSP2                  | TCATAGCGCTTGCAGCTCACTGCAT      | 3'RACE                      |
|                                                    | Cfl_def-1_flSf                  | ATTCTACTGCAAGATTTGAAAGACG      | Full length<br>sequence     |
| Cfl_def-1_flSR                                     | AATTTCTGGTACATATACATTTGTTGA     |                                |                             |
| <i>defensin-2 (def-2)</i><br>(Acc. No.: JQ693412)  | Cfl_def-2_GSP1                  | GACGACGCTGCACCAGGCATTTAGC      | 5'RACE                      |
|                                                    | Cfl_def-2_GSP2                  | CACCATCGACGAGCCGCAATACGAC      | 3'RACE                      |
|                                                    | Cfl_def-2_flSf                  | TCATTTCAAGGGGTATTCGAGTG        | Full length<br>sequence     |
|                                                    | Cfl_def-2_flSR                  | GCGATTGAGAAATTAATACTAAGTGG     |                             |
|                                                    | Cfl_def-2_F788                  | TTTCACTGTGGCAAACACACA          | Seq. primer                 |
